# Supplementary material for: Comb-shaped alkyl imidazolium-functionalized poly(arylene ether sulfone)s as high performance anion-exchange membranes
Source: Royal Society of Chemistry journal article supplement (doi:10.1039/c5ta01123j), 2015-01-01

*Electronic Supplementary Information for*

**Comb-shaped alkyl imidazolium-functionalized poly(arylene ether sulfone)s as high performance anion-exchange membranes**

Anil H.N. Rao,<sup>a</sup> SangYong Nam<sup>b</sup> and Tae-Hyun Kim<sup>\*a</sup>

[\\*tkim@incheon.ac.kr](mailto:*tkim@incheon.ac.kr)

*<sup>a</sup>Organic Material Synthesis Laboratory, Department of Chemistry, Incheon National University, Incheon, 406-772, Korea.*

*<sup>b</sup>Department of Polymer Science and Engineering, Gyeongsang National University, 900 Gazwa-dong, Chinju 660-701, Korea.*

**Figure S1.**  $^1\text{H}$  NMR spectra of the OH-terminated oligomer **2** (a) and the F-terminated oligomer **3** in  $\text{CDCl}_3$

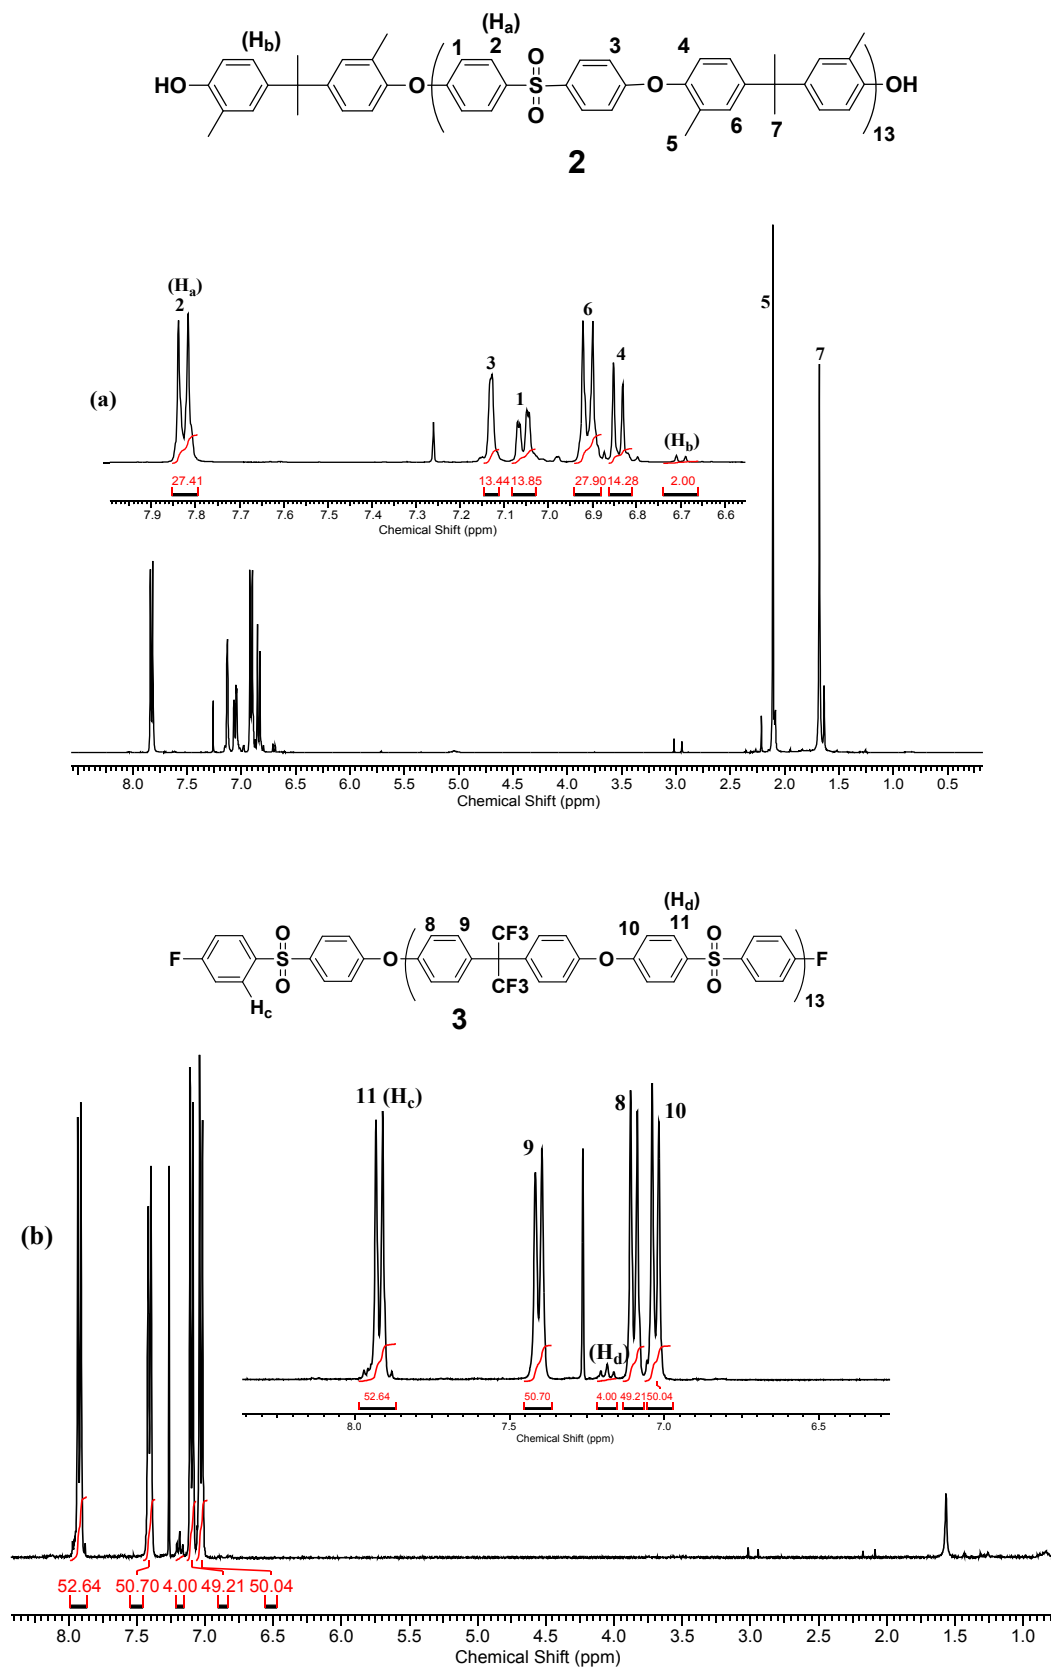

**Figure S2.**  $^1\text{H}$  NMR spectra of the block copolymer **4** and its brominated form **5** in  $\text{CDCl}_3$

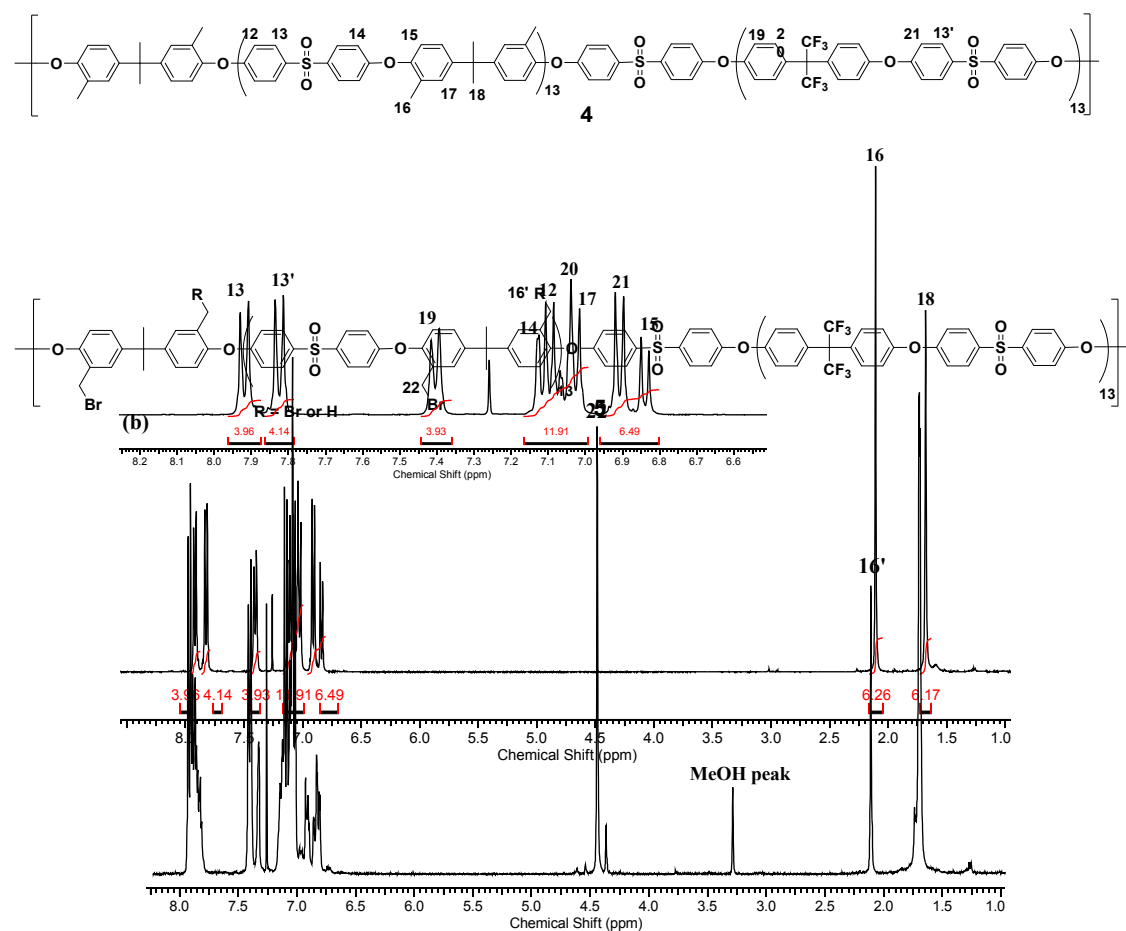

**Figure S3.** Representative Nyquist plots of  $Z''$  vs.  $Z'$  from AC impedance spectroscopy measurements of AI-PES membranes at  $20^\circ\text{C}$

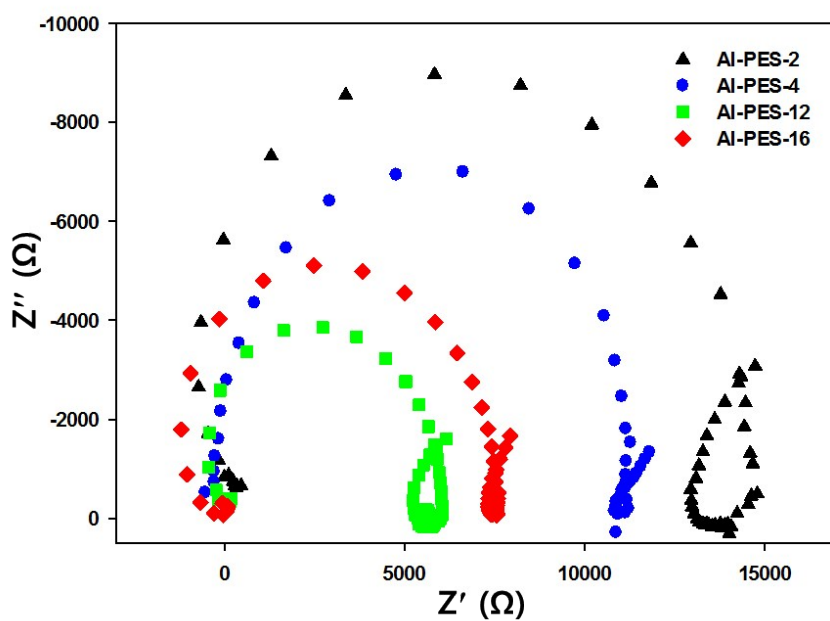

**Figure S4.** Stress-strain curves of the OH<sup>-</sup> forms of the AI-PES membranes in the dry state

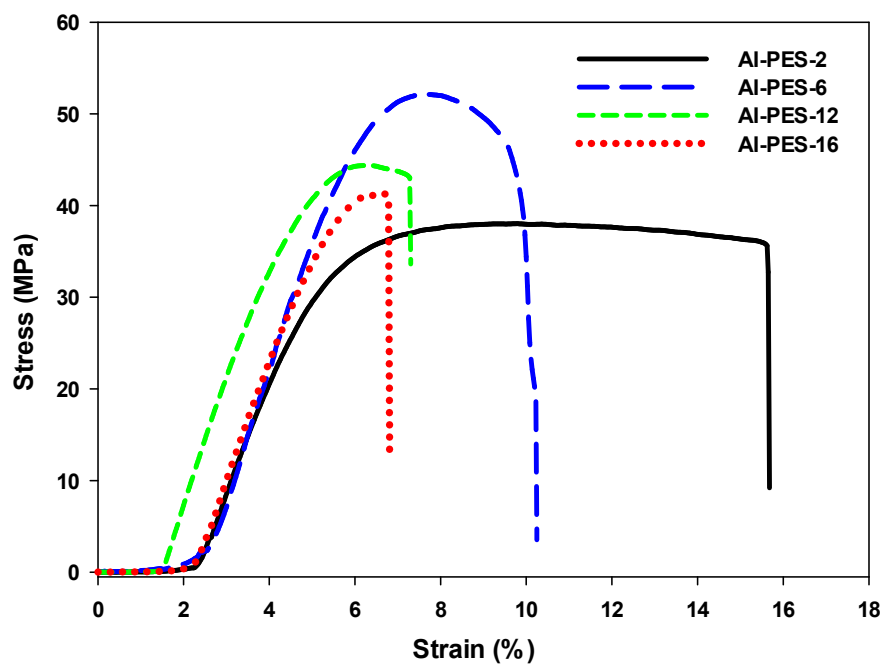

**Table S1.** Dimensional stability in the in-plane direction for the AI-PES membranes

| Membrane  | $\Delta l$      |       |
|-----------|-----------------|-------|
|           | 20 °C           | 80 °C |
| AI-PES-2  | 6.3             | 15.0  |
| AI-PES-6  | 3.3             | 8.3   |
| AI-PES-12 | -- <sup>a</sup> | 5.0   |
| AI-PES-16 | -- <sup>a</sup> | 4.0   |

<sup>a</sup>In-plane swelling was not observed

**Table S2.** Conductivity and IEC of the AI-PES membranes before and after soaking in 2M NaOH at 60 °C for 500 h

| Membrane  | Conductivity at 20 °C (mS/cm) |                 | IEC values (meq/g) |                     |
|-----------|-------------------------------|-----------------|--------------------|---------------------|
|           | Before stability              | After stability | Before stability   | After               |
|           | test                          | test            | test               | stability test      |
| AI-PES-2  | 18                            | - <sup>a</sup>  | 1.20               | - <sup>a</sup>      |
| AI-PES-6  | 30                            | 25              | 1.14               | 1.03 ( $\pm 0.03$ ) |
| AI-PES-12 | 37                            | 31              | 1.02               | 0.88 ( $\pm 0.03$ ) |
| AI-PES-16 | 32                            | 25              | 0.92               | 0.78 ( $\pm 0.03$ ) |

a: Membrane was broken into pieces

**Figure S5.** FT-IR spectra of the AI-PES-6 before (a) and after (a'), AI-PES-12 before (b) and after (b'), and AI-PES-16 before (c) and after (c') soaking in 2 M NaOH at 60 °C for 500 h

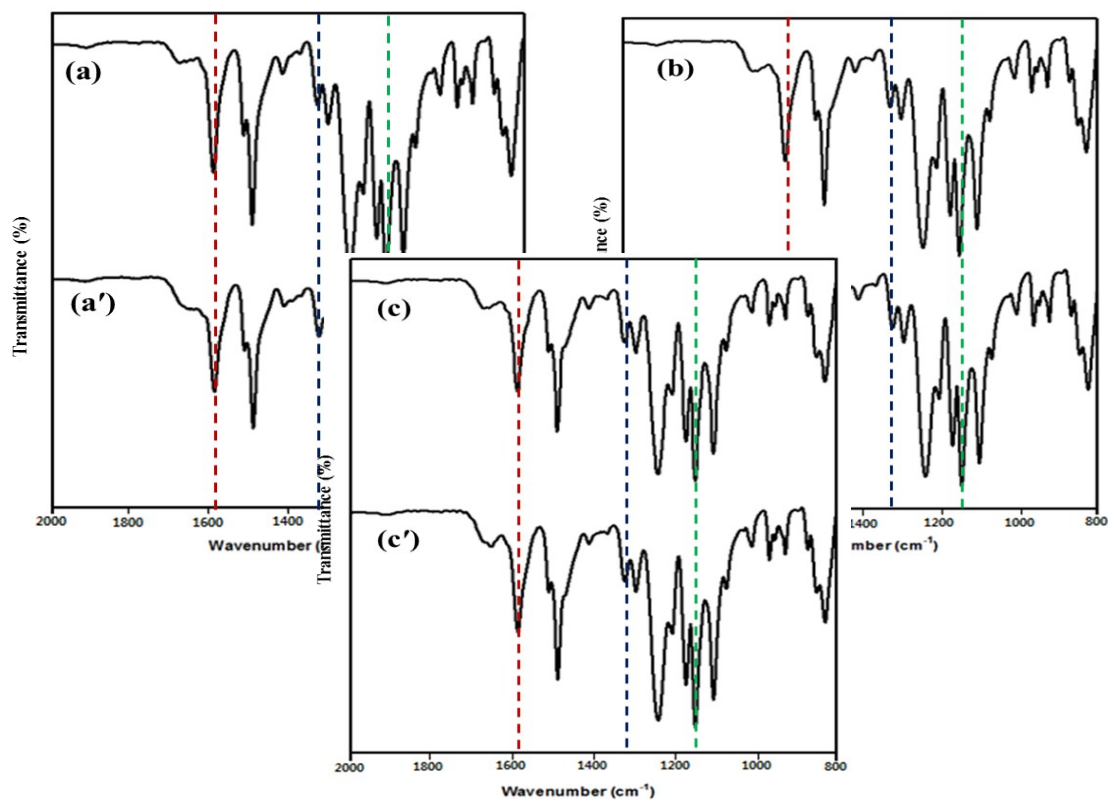

Supplement: c5ta01123j1.pdf [file c5ta01123j1.pdf]
